# Supplementary material
Source: PubMed Central journal article supplement (PMC1794320)
Supplement: NIHMS9316-supplement-suppfig.pdf [file NIHMS9316-supplement-suppfig.pdf]

Supplemental Fig. 1

*Araneus cavaticus*

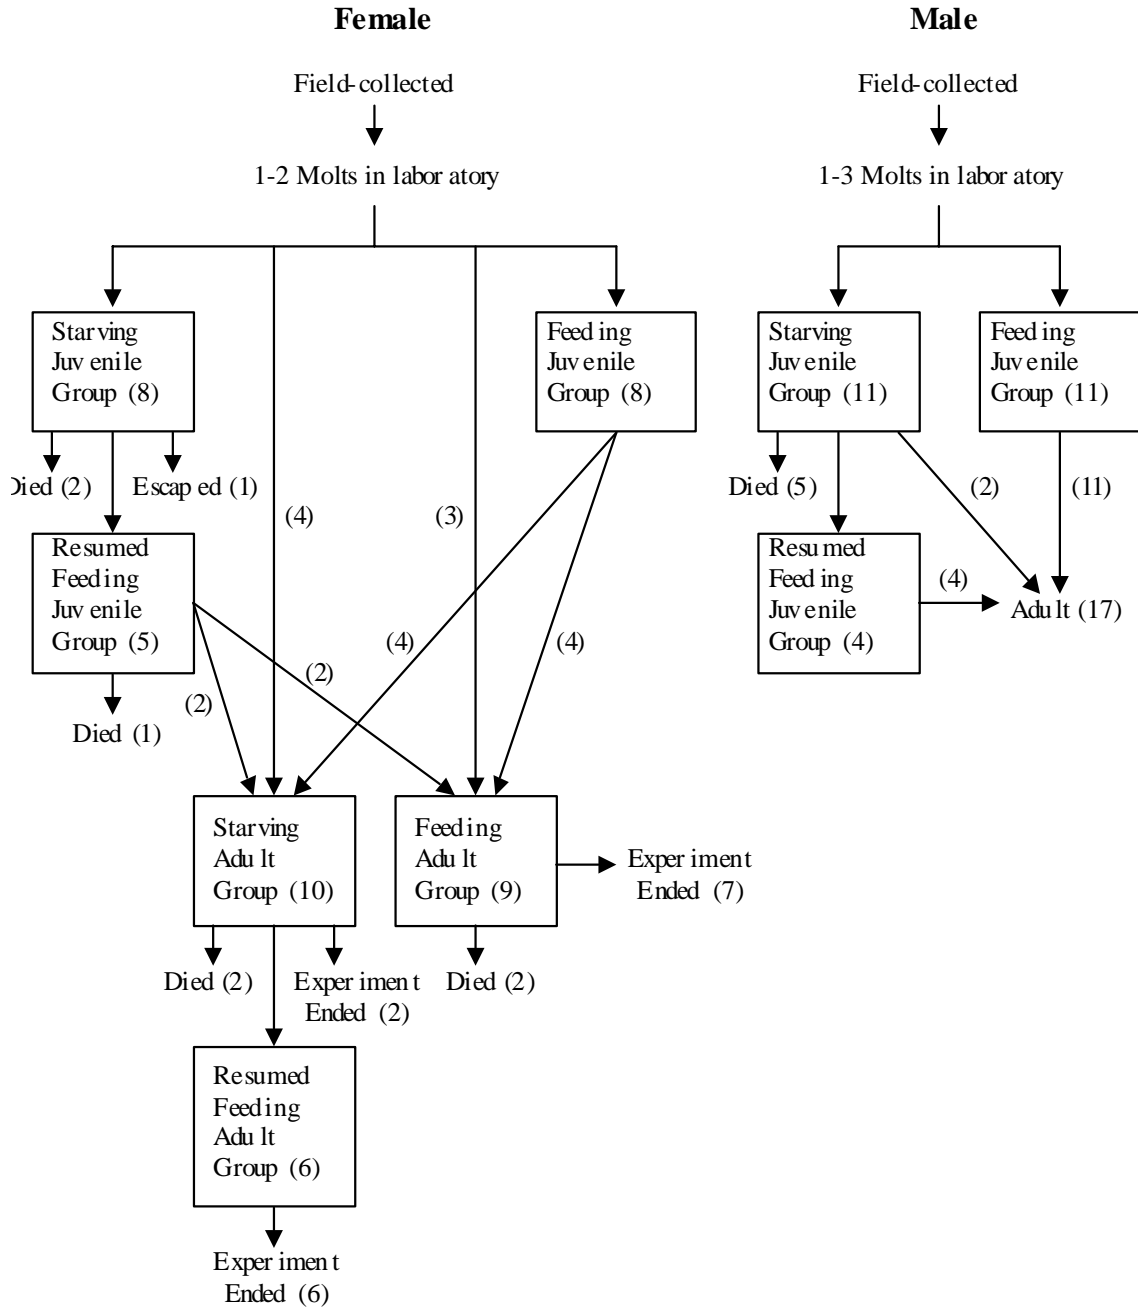

*Argiope aurantia*

**Female**

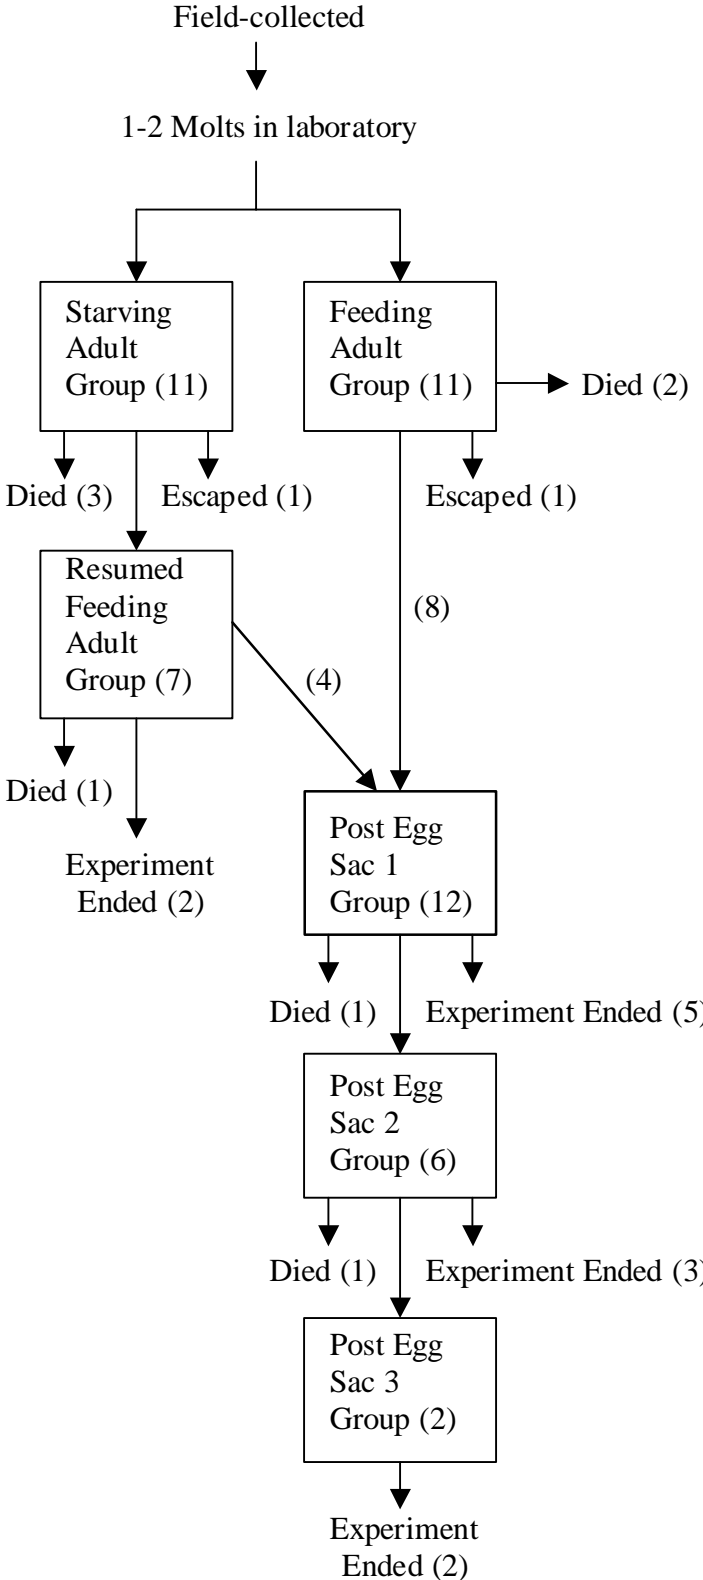

# *Argiope trifasciata*

## Female

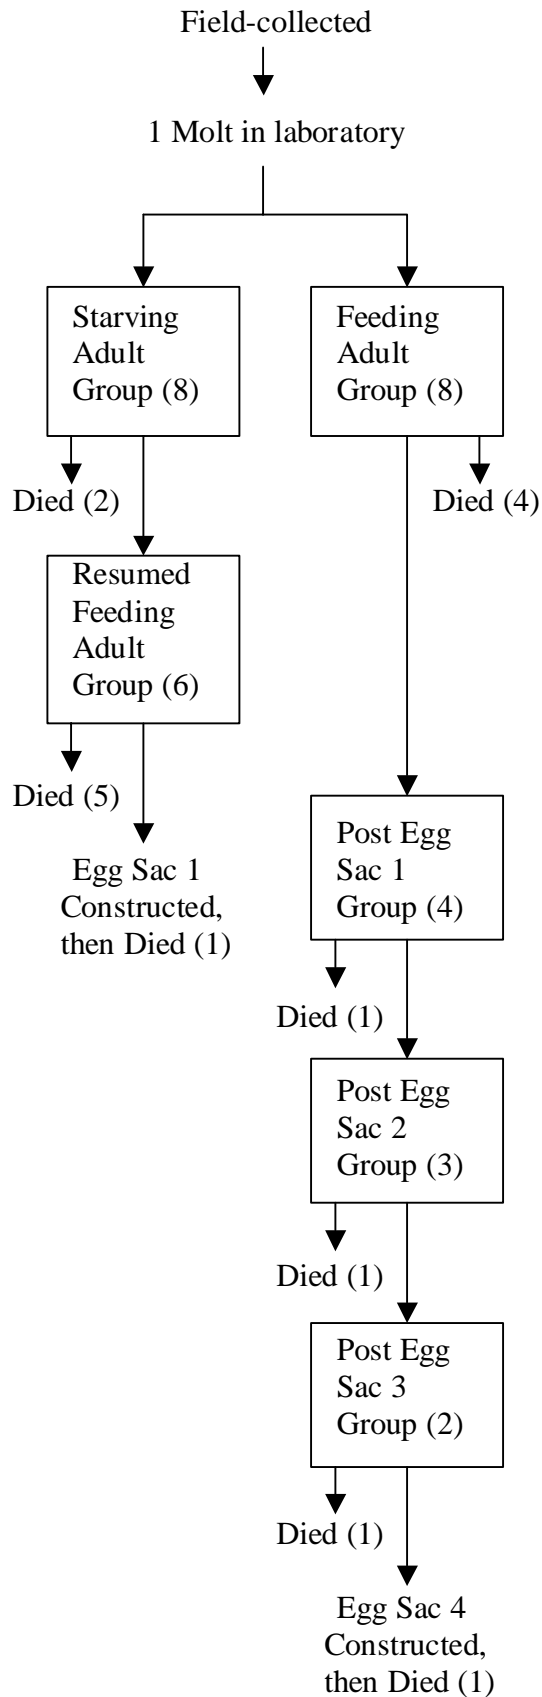

Supplemental Fig. 2

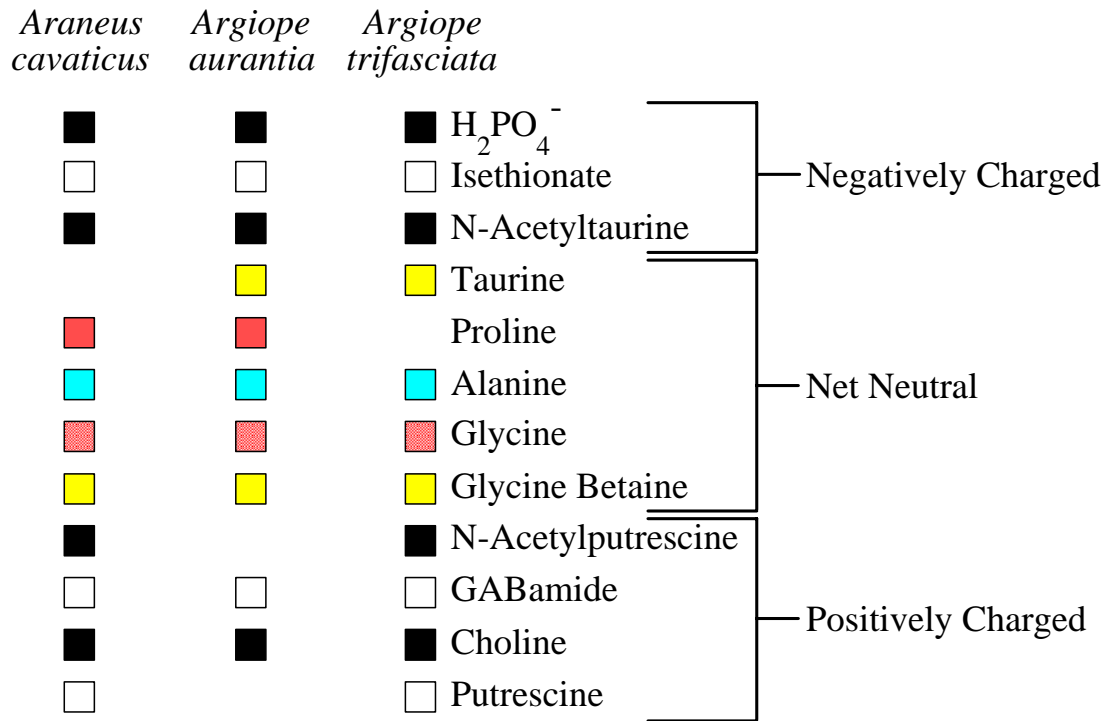

Webs of *Araneus cavaticus* Juvenile Males

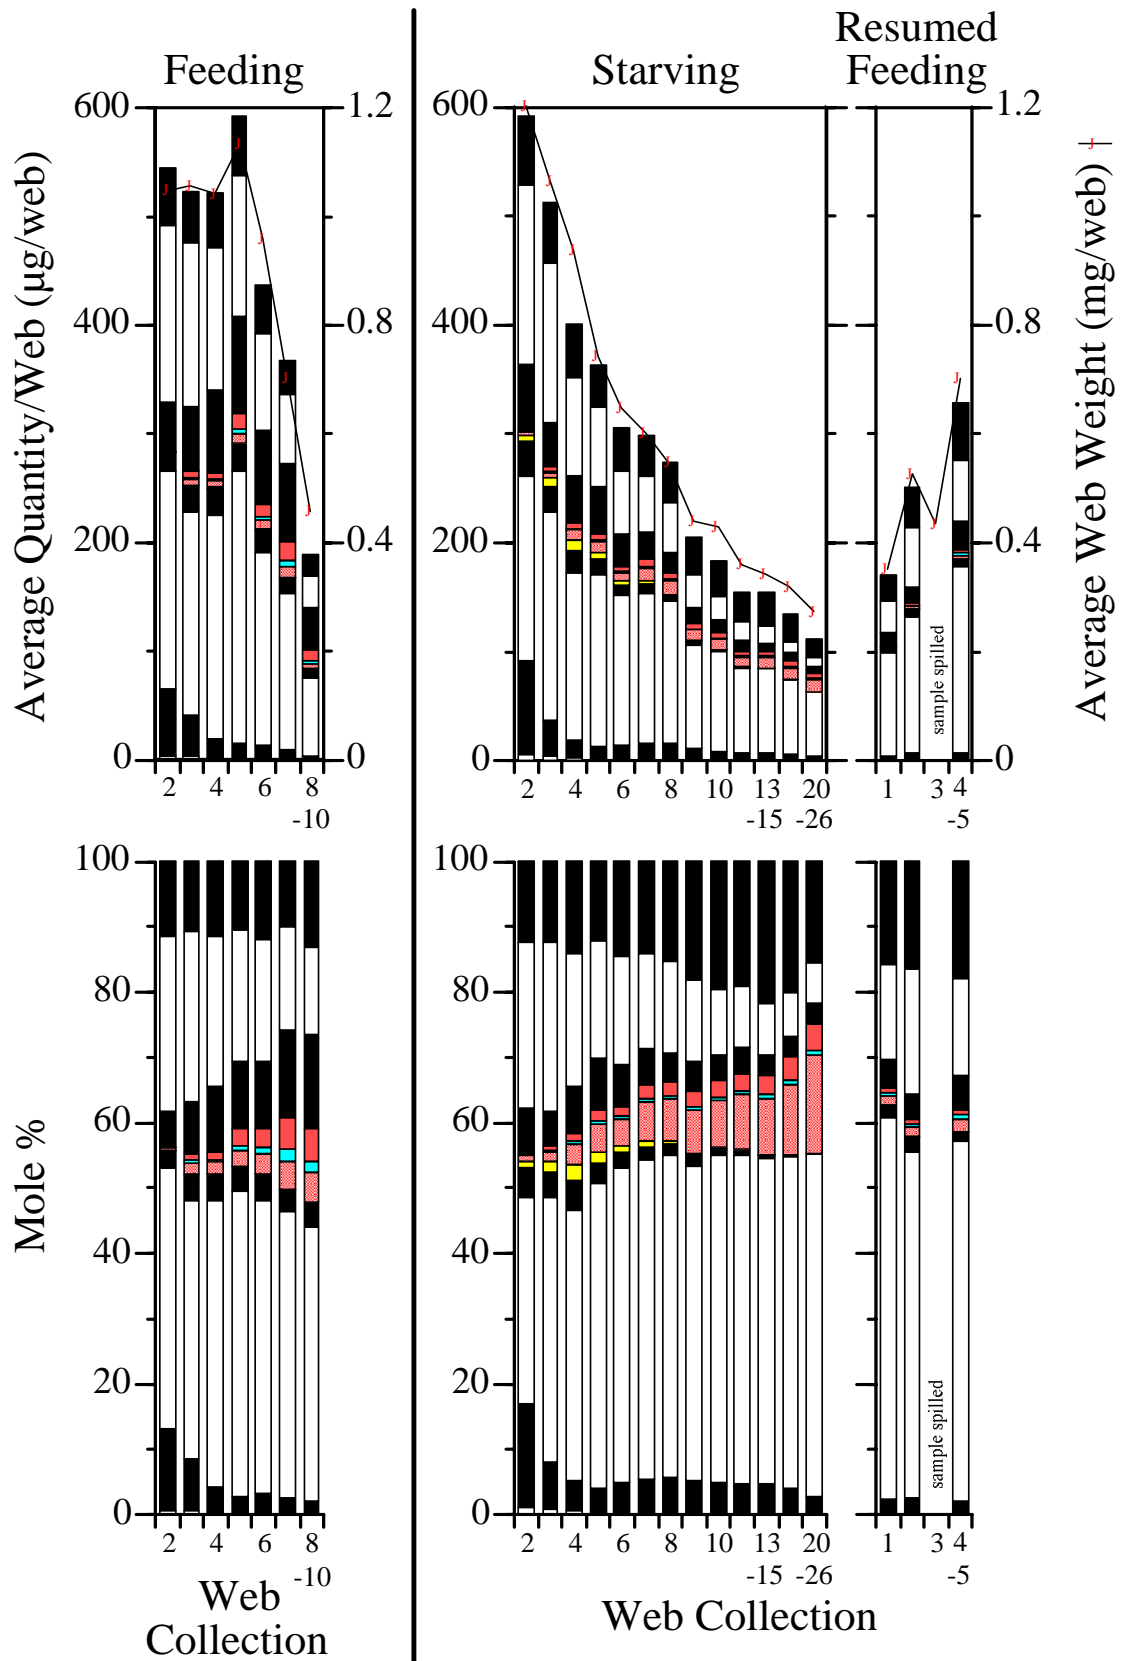

Supplemental Fig. 3

Webs of *Araneus cavaticus* Juvenile Females

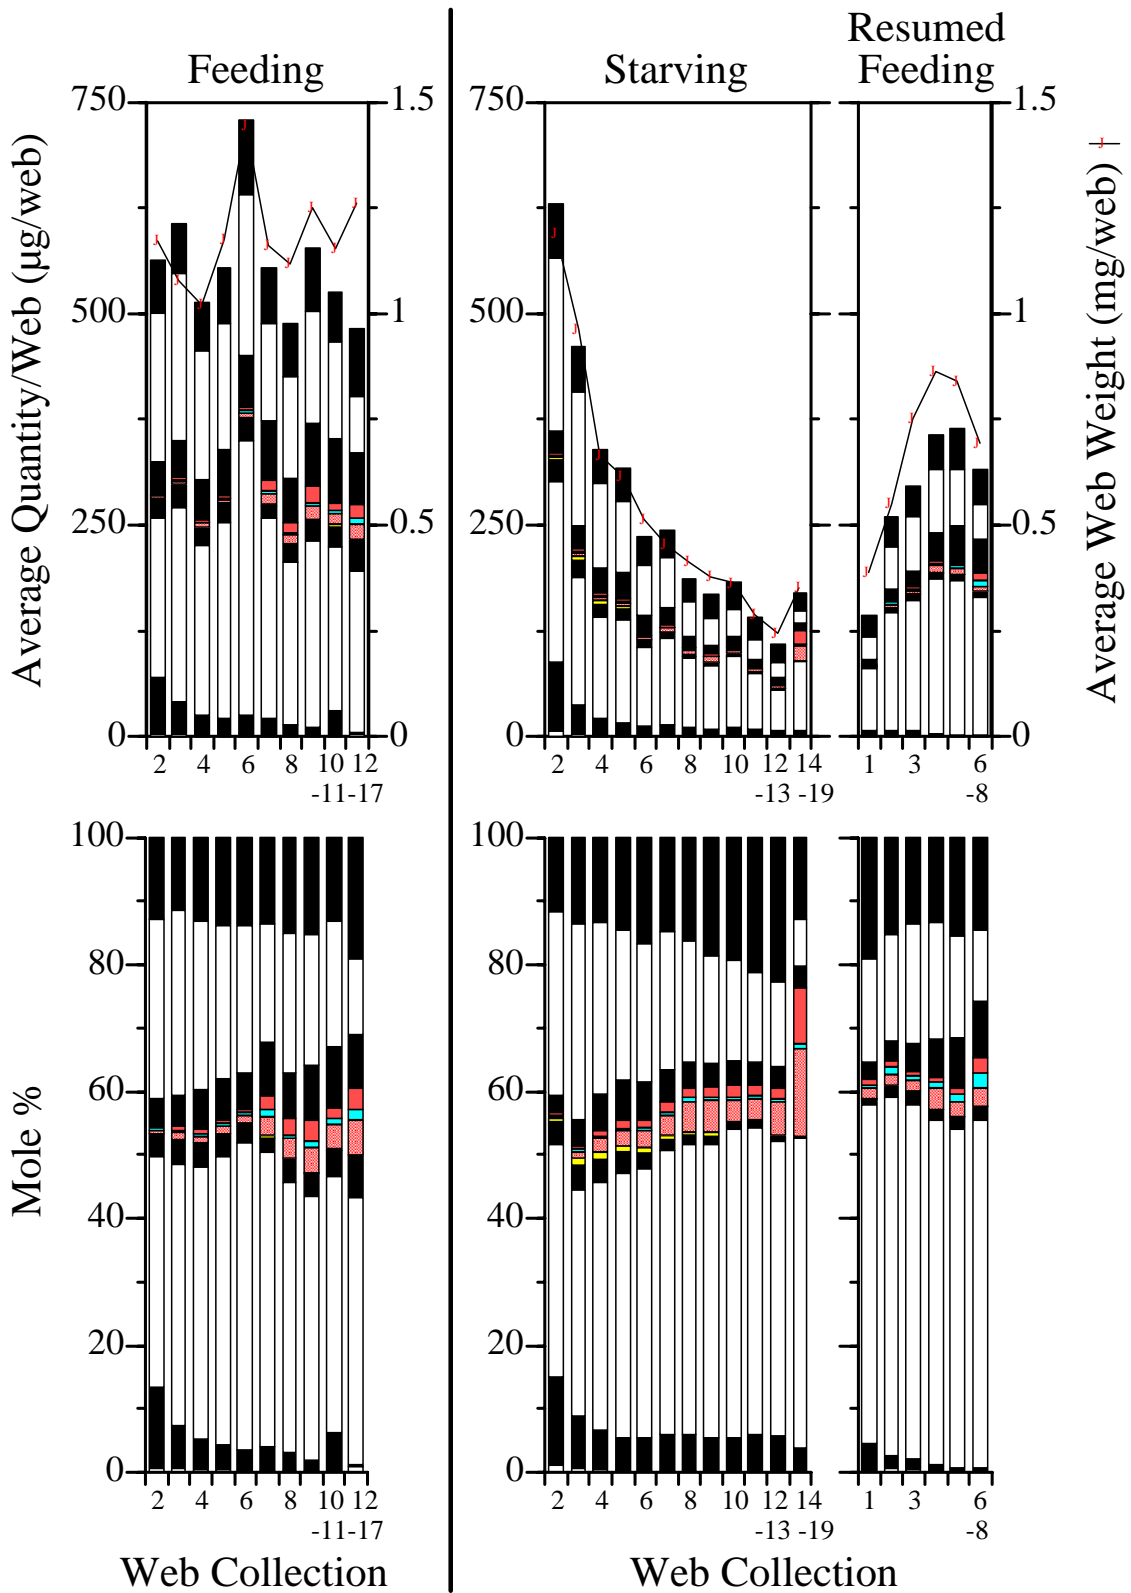

Supplemental Fig. 4

Webs of *Araneus cavaticus* Adult Females

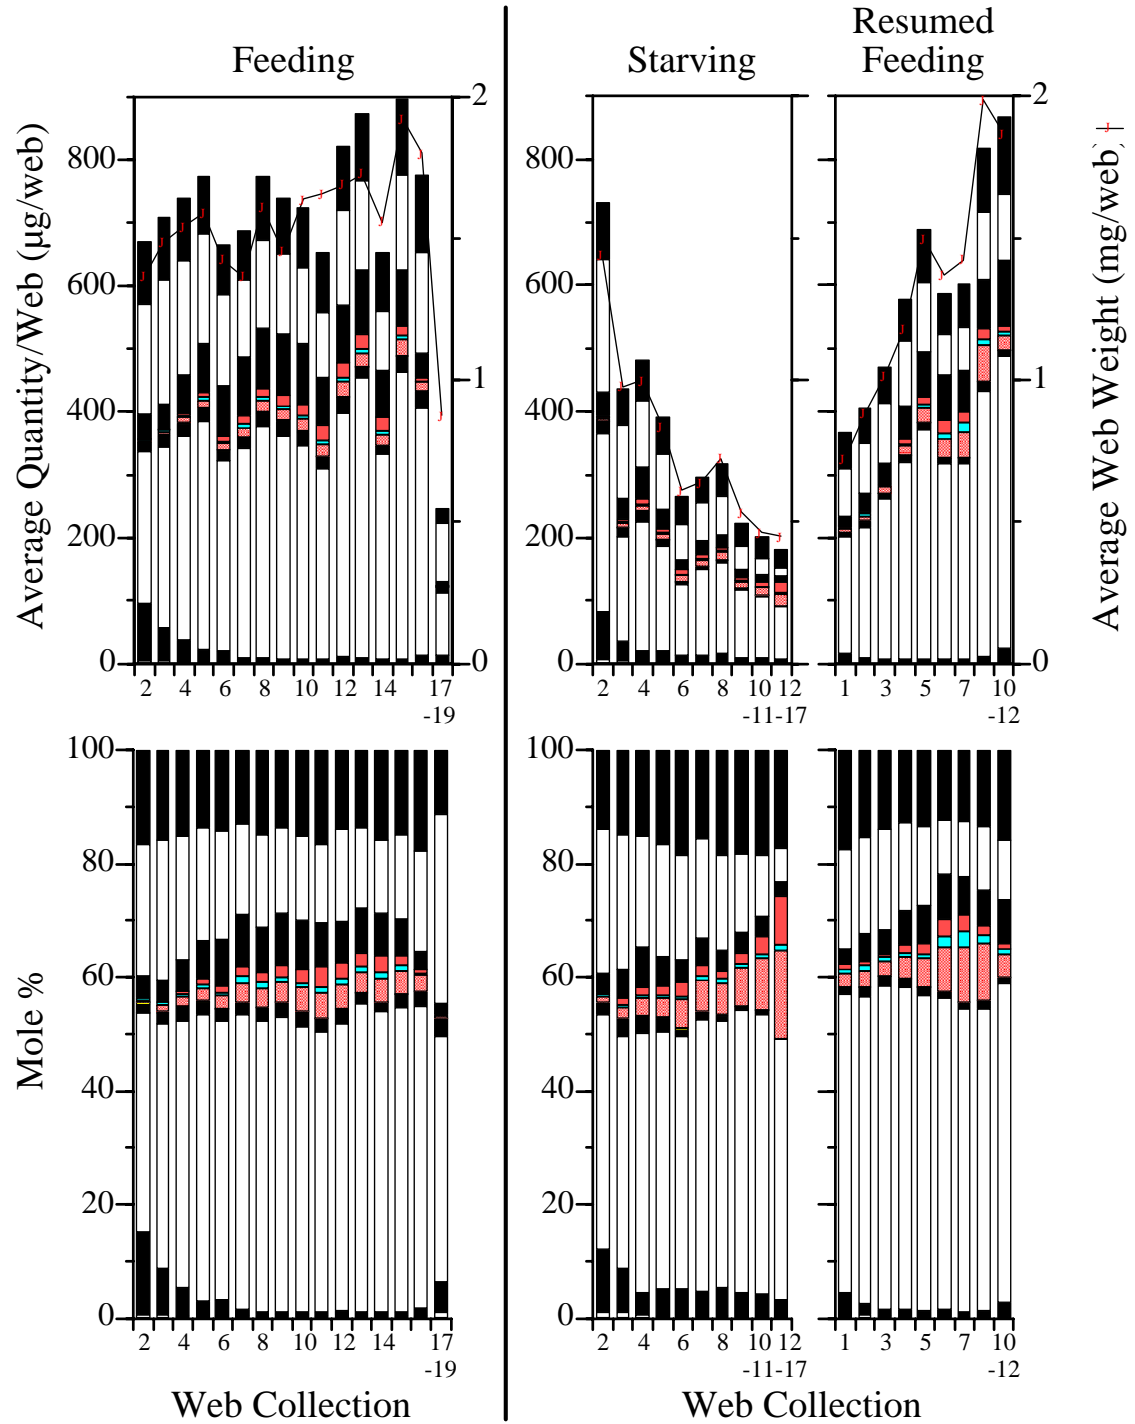

Supplemental Fig. 5

Webs of *Argiope aurantia* Adult Females

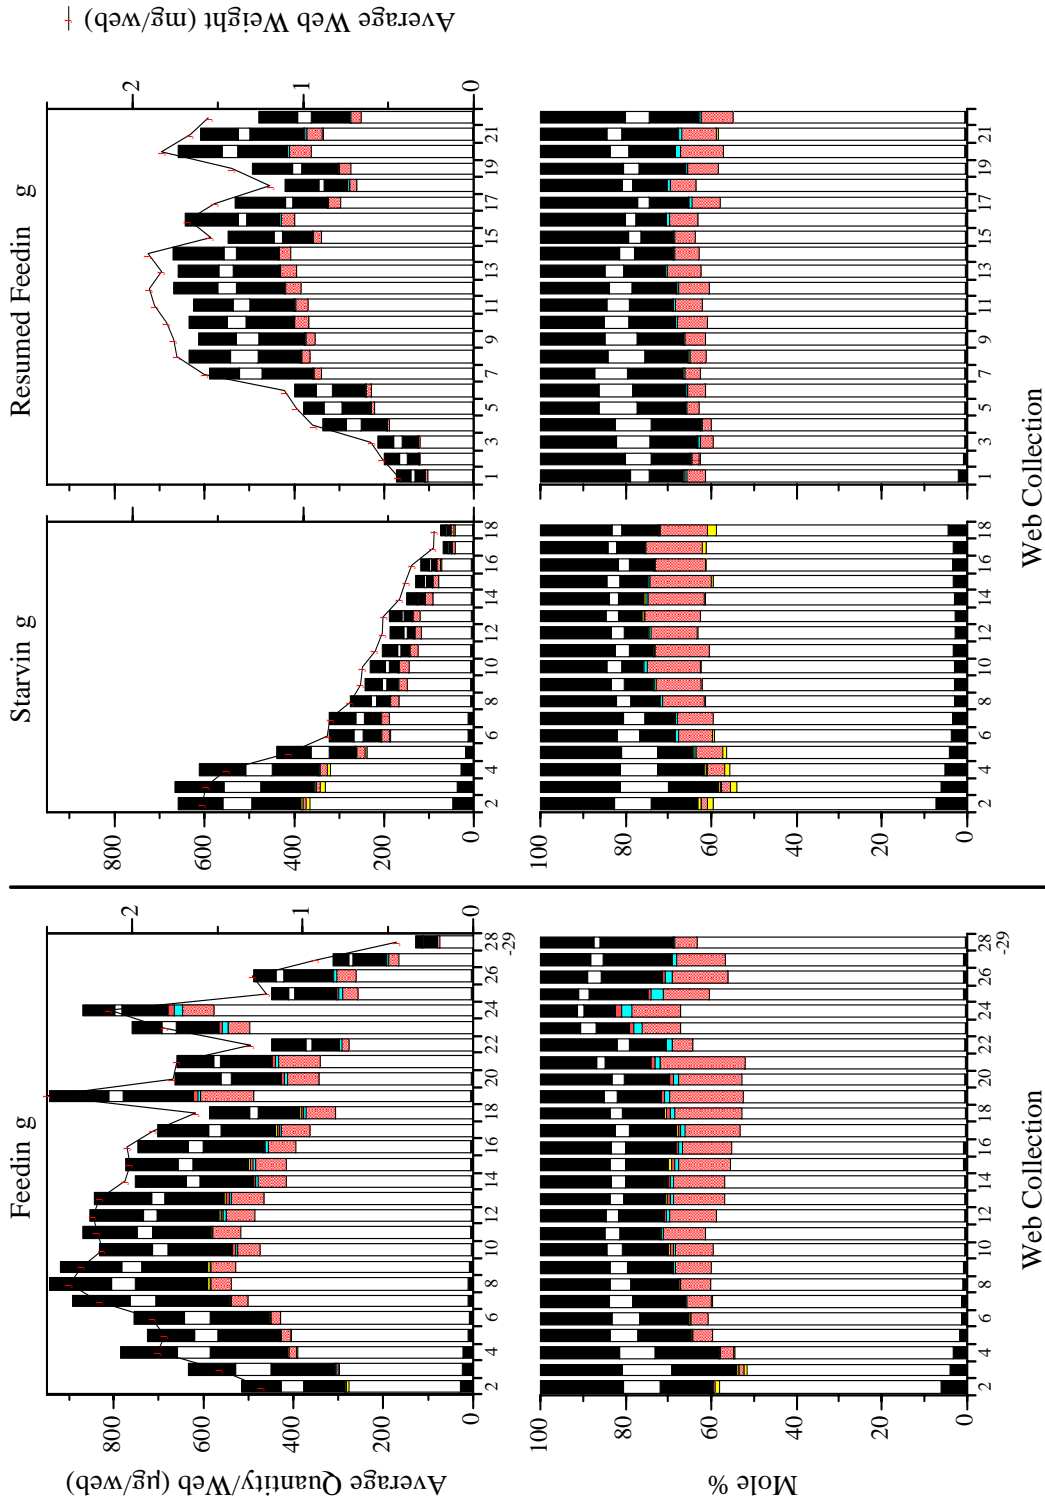

Web Collection

Web Collection

Supplemental Fig. 6



*Argiope aurantia*

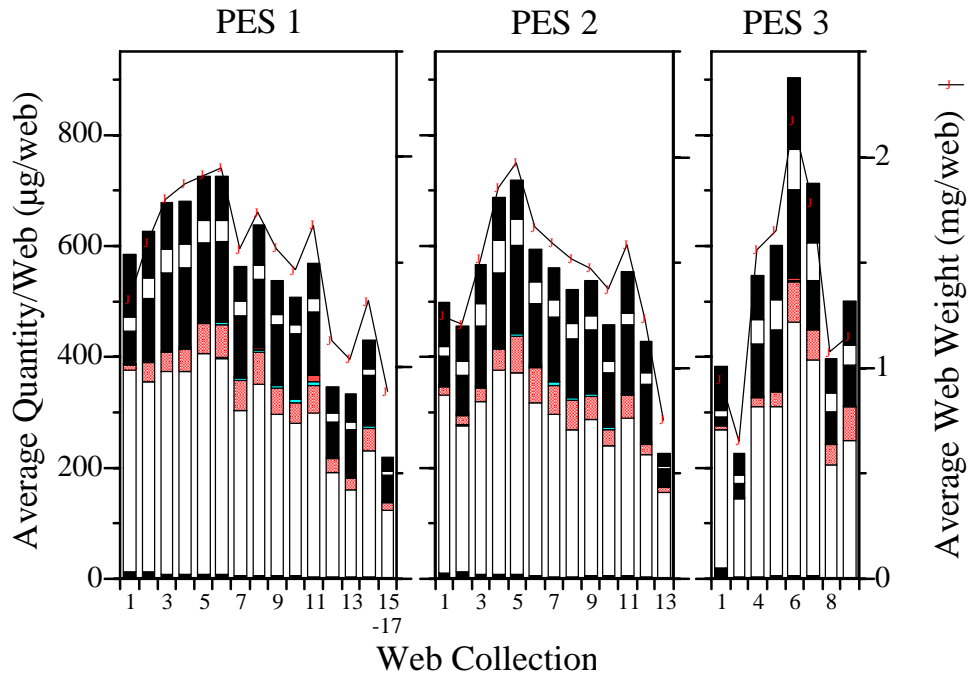

*Argiope trifasciata*

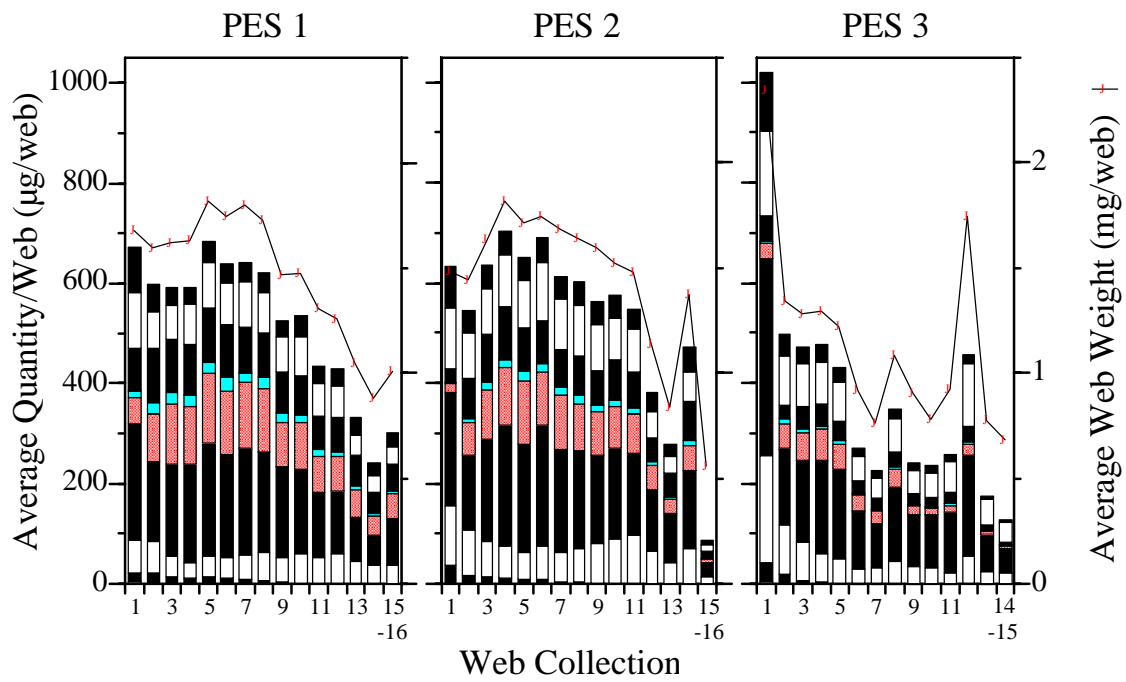

Supplemental Fig. 7

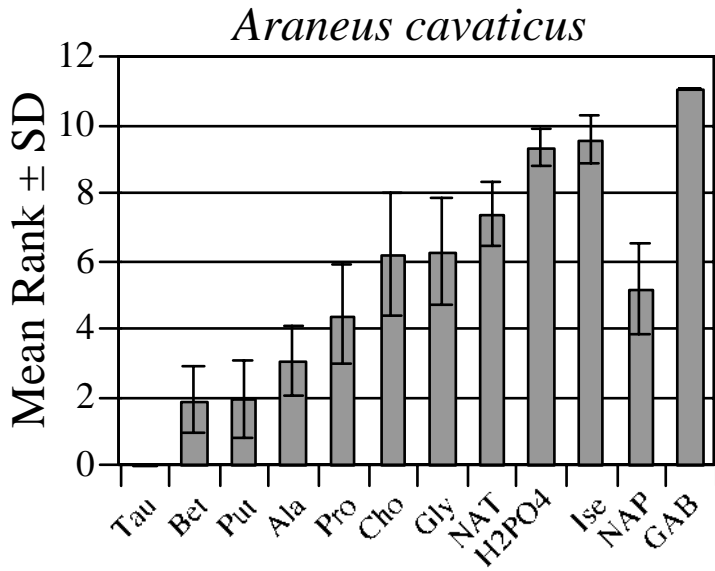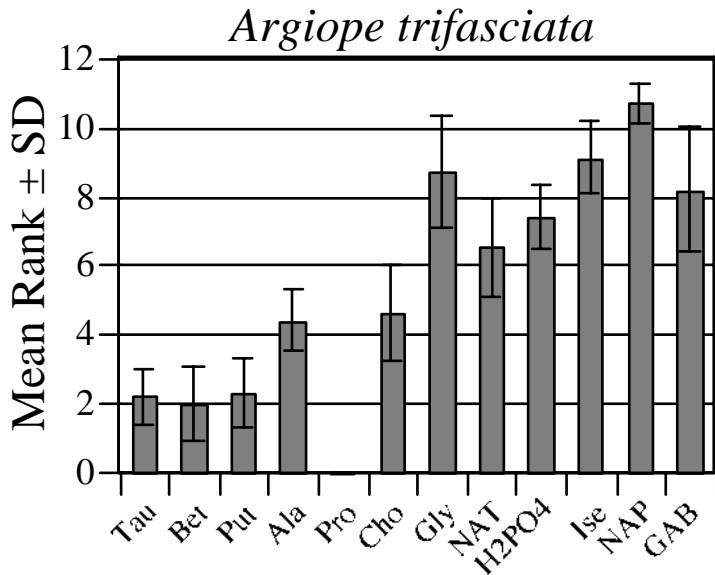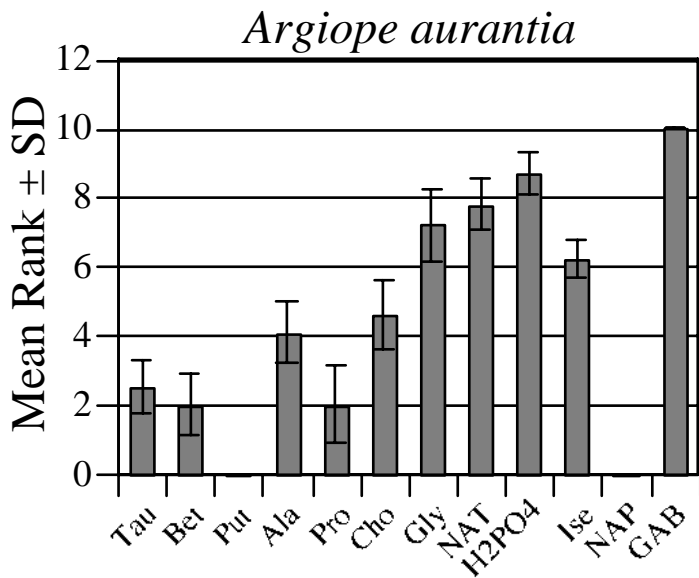

Supplemental Fig. 8
