# Supplementary material
Source: PubMed Central journal article supplement (PMC1794320)
Supplement: NIHMS9316-supplement-supptab.pdf [file NIHMS9316-supplement-supptab.pdf]

Supplemental Table 1. Number of webs in each of the analyzed non-radioactive web collections

| Group                     | 1 | 2  | 3  | 4  | 5 | 6 | 7 | 8 | 9 | 10 | 11 | 12 | 13 | 14 | 15 | 16 | 17 | 18 | 19 | 20 | 21 | 22 | 23 | 24 | 25 | 26 | 27 | 28 | 29 | 30 | 31 | 32 | 33 | 34 |   |   |   |   |  |
|---------------------------|---|----|----|----|---|---|---|---|---|----|----|----|----|----|----|----|----|----|----|----|----|----|----|----|----|----|----|----|----|----|----|----|----|----|---|---|---|---|--|
| Web Collection            | 1 | 2  | 3  | 4  | 5 | 6 | 7 | 8 | 9 | 10 | 11 | 12 | 13 | 14 | 15 | 16 | 17 | 18 | 19 | 20 | 21 | 22 | 23 | 24 | 25 | 26 | 27 | 28 | 29 | 30 | 31 | 32 | 33 | 34 |   |   |   |   |  |
| <i>Araneus cavaticus</i>  |   |    |    |    |   |   |   |   |   |    |    |    |    |    |    |    |    |    |    |    |    |    |    |    |    |    |    |    |    |    |    |    |    |    |   |   |   |   |  |
| <b>Penultimate Instar</b> |   |    |    |    |   |   |   |   |   |    |    |    |    |    |    |    |    |    |    |    |    |    |    |    |    |    |    |    |    |    |    |    |    |    |   |   |   |   |  |
| <b>Female</b>             |   |    |    |    |   |   |   |   |   |    |    |    |    |    |    |    |    |    |    |    |    |    |    |    |    |    |    |    |    |    |    |    |    |    |   |   |   |   |  |
| Starving                  |   |    |    | 8  | 8 | 8 | 8 | 8 | 8 | 8  | 8  | 8  | 8  | 8  | 8  | 8  | 8  | 8  | 8  | 8  | 8  | 8  | 8  | 8  | 8  | 8  | 8  | 8  | 8  | 8  | 8  | 8  | 8  | 8  | 8 | 8 | 8 |   |  |
| Resumed Feeding           | 5 | 4  | 4  | 4  | 4 | 4 | 3 | 1 | 1 | 1  |    |    |    |    |    |    |    |    |    |    |    |    |    |    |    |    |    |    |    |    |    |    |    |    |   |   |   |   |  |
| Feeding                   |   | 8  | 8  | 8  | 8 | 7 | 5 | 3 | 3 | 2  | 2  | 1  | 1  | 1  | 1  | 1  | 1  | 1  | 1  | 1  | 1  | 1  | 1  | 1  | 1  | 1  | 1  | 1  | 1  | 1  | 1  | 1  | 1  | 1  | 1 | 1 | 1 |   |  |
| <b>Male</b>               |   |    |    |    |   |   |   |   |   |    |    |    |    |    |    |    |    |    |    |    |    |    |    |    |    |    |    |    |    |    |    |    |    |    |   |   |   |   |  |
| Starving                  |   |    |    |    |   |   |   |   |   |    |    |    |    |    |    |    |    |    |    |    |    |    |    |    |    |    |    |    |    |    |    |    |    |    |   |   |   |   |  |
| Resumed Feeding           | 4 | 4  | 3  | 2  | 2 |   |   |   |   |    |    |    |    |    |    |    |    |    |    |    |    |    |    |    |    |    |    |    |    |    |    |    |    |    |   |   |   |   |  |
| Feeding                   |   | 11 | 11 | 10 | 9 | 9 | 9 | 9 | 8 | 7  | 6  | 6  | 5  | 4  | 3  | 3  | 3  | 3  | 2  | 1  | 1  | 1  | 1  | 1  | 1  | 1  | 1  | 1  | 1  | 1  | 1  | 1  | 1  | 1  | 1 | 1 | 1 | 1 |  |
| <b>Adult Female</b>       |   |    |    |    |   |   |   |   |   |    |    |    |    |    |    |    |    |    |    |    |    |    |    |    |    |    |    |    |    |    |    |    |    |    |   |   |   |   |  |
| Starving                  |   |    |    |    |   |   |   |   |   |    |    |    |    |    |    |    |    |    |    |    |    |    |    |    |    |    |    |    |    |    |    |    |    |    |   |   |   |   |  |
| Resumed Feeding           | 6 | 6  | 6  | 5  | 5 | 4 | 3 | 2 | 2 | 1  | 1  | 1  | 1  | 1  | 1  | 1  | 1  | 1  | 1  | 1  | 1  | 1  | 1  | 1  | 1  | 1  | 1  | 1  | 1  | 1  | 1  | 1  | 1  | 1  | 1 | 1 | 1 | 1 |  |
| Feeding                   |   | 6  | 8  | 8  | 7 | 6 | 5 | 5 | 5 | 5  | 5  | 5  | 5  | 5  | 5  | 5  | 5  | 5  | 5  | 5  | 5  | 5  | 5  | 5  | 5  | 5  | 5  | 5  | 5  | 5  | 5  | 5  | 5  | 5  | 5 | 5 | 5 | 5 |  |

*Argiope aurantia*

**Adult Female**

Starving 11 11 11 11 11 10 10 9 8 8 7 7 7 7 6 4 4  
Resumed Feeding 7 7 7 7 7 6 6 6 6 6 6 5 5 5 4 4 2 2 1  
Feeding 10 11 10 10 10 10 10 10 9 9 8 8 7 7 6 3 3 2 1 1 1 1 1  
Post-Egg-Sac 1 12 12 12 12 12 12 11 11 8 7 6 5 2 1 1 1  
Post-Egg-Sac 2 5 6 6 6 6 6 6 6 5 5 3 3 1  
Post-Egg-Sac 3 2 1 1 1 1 1 1 1 1

---

*Argiope trifasciata*

**Adult Female**

Starving 8 8 8 8 8 8 8 8 7 7 7 7 6 6 5 4  
Resumed Feeding 6 6 6 6 6 6 6 6 6 6 6 6 5 4 4 4 4 4 3 2 2 2 1  
Feeding 8 8 8 8 8 8 8 8 8 8 8 8 8 8 7 7 7 6 5 4 4 4 3 2 2  
Post-Egg-Sac 1 4 4 4 4 4 4 4 4 4 4 4 4 4 1 1  
Post-Egg-Sac 2 3 3 3 3 3 3 3 3 3 3 3 3 1 1 1  
Post-Egg-Sac 3 2 2 2 2 2 2 2 2 2 2 2 1 1 1 1

In general, the number of webs per web collection decreased over the series for a given group because different individuals built different numbers of webs before their inclusion in the group ended. In two instances a web of one group was mistakenly added to webs of a different group, resulting in a total of five webs having to be discarded. This is the explanation for the anomalous number of webs in the web 2 collections of the *A. aurantia* feeding adult and *A. cavaticus* feeding adult groups and in the web 1 collection of the *A. aurantia* PES2 group.

Underlining is used to show those web collections that were 'horizontally pooled' prior to NMR analysis (see 'Gravimetric measurements of orb webs' in Materials and Methods).

In all starving and feeding groups, spiders were allowed to recycle their web 1; thus, there is no web collection 1 from these groups.

---

Supplemental Table 2. Effect of different pulse repetition and/or acquisition times on LMM quantitation by <sup>1</sup>H-NMR, as determined by analyzing a standard solution containing the 11 organic LMM in equimolar concentration

| Pulse Repetition<br>Time (sec) | Acquisition<br>Time (sec) | % Error in Measured Molar %,<br>Assumption B<br>(Mean ± SEM) |                              |
|--------------------------------|---------------------------|--------------------------------------------------------------|------------------------------|
|                                |                           | Assumption A<br>(Mean ± SEM)                                 | Assumption B<br>(Mean ± SEM) |
| 3.28 <sup>a</sup>              | 3.28                      | 7.3 ± 2.55                                                   | 6.5 ± 1.80                   |
| 8.28                           | 3.28                      | 6.1 ± 1.61                                                   | 3.0 ± 0.73                   |
| 8.28 <sup>b</sup>              | 6.55                      | 4.0 ± 1.25                                                   | 3.8 ± 0.77                   |
| 16.55                          | 6.55                      | 4.3 ± 0.90                                                   | 2.9 ± 0.77                   |
| 33.11                          | 6.55                      | 5.4 ± 1.26                                                   | —                            |

<sup>1</sup>H-NMR analysis of the equimolar solution was performed four times with each of the five different sets of acquisition parameters. Thus, the measured molar percentage of each of the 11 LMM, used to calculate % error, is the average of four analyses.

In Assumption A, the actual molar % of each LMM is assumed to be 9.09 mole % (100 mole % ÷ 11 LMM). This approach assumes an exactly equimolar standard solution was prepared. In Assumption B, the molar percentages obtained using the longest repetition time (33.11 sec) are assumed to be closest to the true molar percentages.

<sup>a</sup> These acquisition parameters were used in the analysis of all *A. cavaticus* web extracts.

<sup>b</sup> These acquisition parameters were used in the analysis of all *A. aurantia* and *A. trifasciata* web extracts.

Supplemental Table 3. *Linear regression slopes describing the change in the water-soluble percentage of the web over the series of web collections*

| <b>Group</b>                                         | <b>Slope</b> | <b>N</b> |
|------------------------------------------------------|--------------|----------|
| <i>A. cavaticus</i> Feeding Juvenile Males           | -1.598***    | 7        |
| <i>A. cavaticus</i> Starving Juvenile Males          | -0.497***    | 13       |
| <i>A. cavaticus</i> Resumed Feeding Juvenile Males   | 3.136        | 4        |
| <i>A. cavaticus</i> Feeding Juvenile Females         | -0.095       | 10       |
| <i>A. cavaticus</i> Starving Juvenile Females        | -0.648**     | 12       |
| <i>A. cavaticus</i> Resumed Feeding Juvenile Females | -0.461       | 6        |
| <i>A. cavaticus</i> Feeding Adult Females            | -0.591***    | 16       |
| <i>A. cavaticus</i> Starving Adult Females           | -0.442       | 10       |
| <i>A. cavaticus</i> Resumed Feeding Adult Females    | 0.119        | 9        |
| <i>A. aurantia</i> Feeding Adult Females             | -0.224*      | 27       |
| <i>A. aurantia</i> Starving Adult Females            | -0.811***    | 17       |
| <i>A. aurantia</i> Resumed Feeding Adult Females     | -0.328***    | 22       |
| <i>A. aurantia</i> Post-Egg-Sac 1 Adult Females      | -1.367**     | 17       |
| <i>A. aurantia</i> Post-Egg-Sac 2 Adult Females      | -0.612***    | 13       |
| <i>A. aurantia</i> Post-Egg-Sac 3 Adult Females      | 1.092        | 9        |
| <i>A. trifasciata</i> Feeding Adult Females          | -0.162       | 33       |
| <i>A. trifasciata</i> Starving Adult Females         | -0.504**     | 17       |
| <i>A. trifasciata</i> Resumed Feeding Adult Females  | -0.479**     | 29       |
| <i>A. trifasciata</i> Post-Egg-Sac 1 Adult Females   | -0.976***    | 15       |
| <i>A. trifasciata</i> Post-Egg-Sac 2 Adult Females   | -1.363**     | 15       |

*A. trifasciata* Post-Egg-Sac 3 Adult Females -1.646\*\*\* 14

Slope differs significantly from zero, \*  $P < 0.05$ , \*\*  $P < 0.01$ , \*\*\*  $P < 0.001$ .

*N*, number of web collections water-extracted separately.

---

Supplemental Tables 4-6 are Microsoft Excel spreadsheets that we would like readers to be able to access as spreadsheets (i.e., be able to copy and paste columns and rows of data to work with). If this is not possible, we will supply the data just as regular tables, albeit very long ones.
